# Supplementary material for: Impact of Cryopreservation on Motile Subpopulations and Tyrosine-Phosphorylated Regions of Ram Spermatozoa during Capacitating Conditions
Source: MDPI journal article supplement (doi:10.3390/biology10111213), 2021-11-20
Supplement: s1 [file s1]

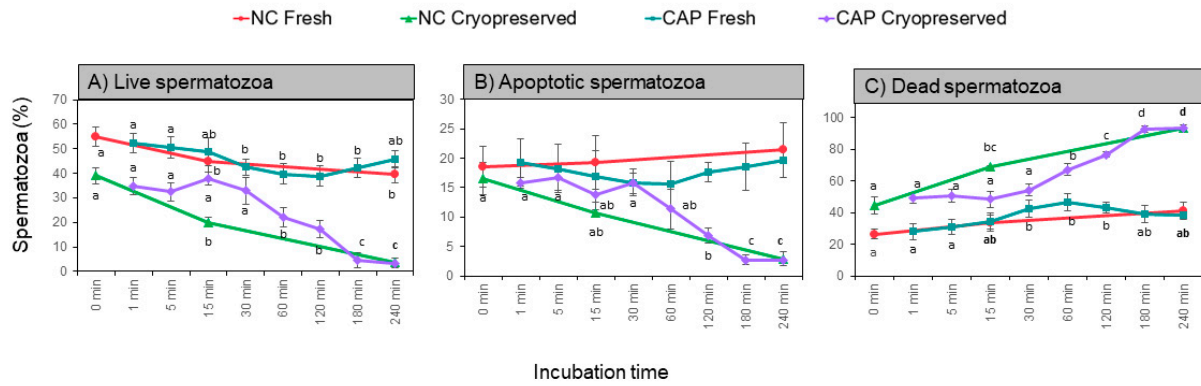

**Supplementary figure S2.** Sperm viability of fresh and cryopreserved samples during the incubation period under capacitating (CAP) and non-capacitating (NC) conditions. Values showed the average proportion ( $\pm$  S.E.M) of (A) live, (B) apoptotic and (C) dead spermatozoa in each time (n = 12 ejaculates, 4 rams). Different letters indicate significant differences ( $P < 0.05$ ) among incubation times within each type of sample.
