# Supplementary material for: Impact of Cryopreservation on Motile Subpopulations and Tyrosine-Phosphorylated Regions of Ram Spermatozoa during Capacitating Conditions
Source: MDPI journal article supplement (doi:10.3390/biology10111213), 2021-11-20
Supplement: s1 [file s1]

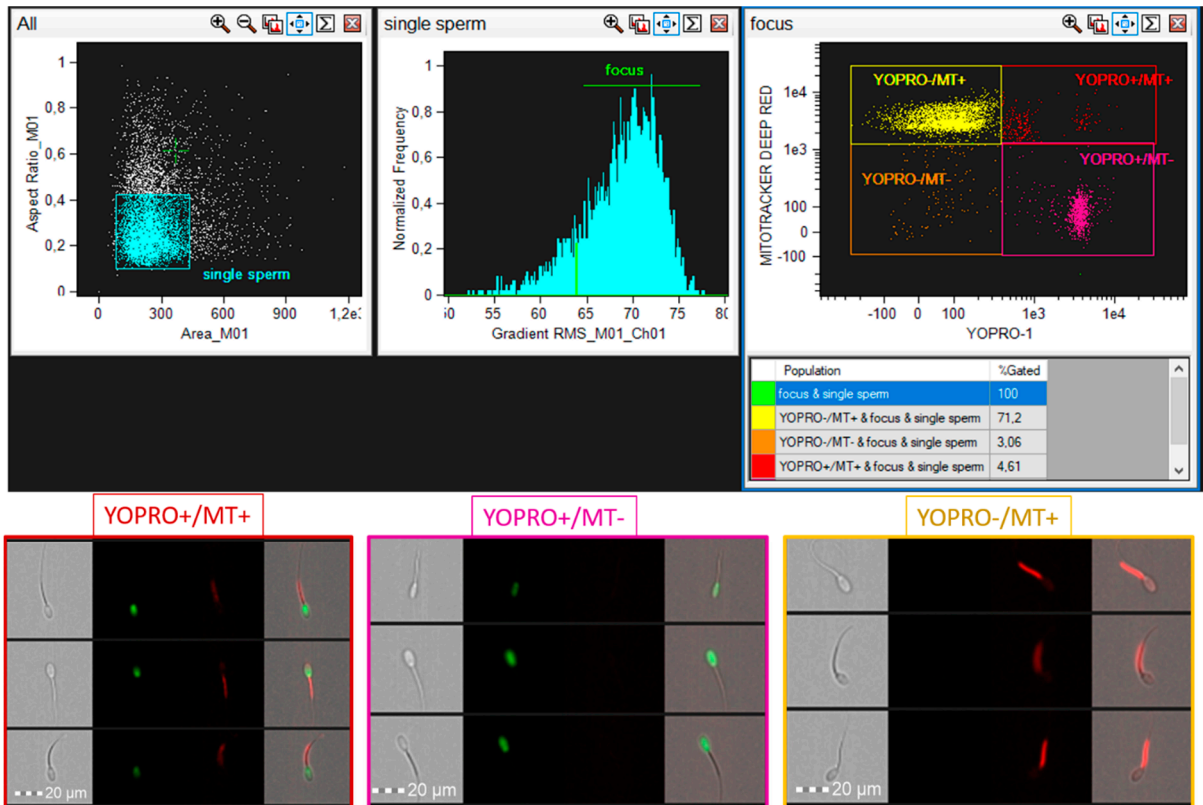

**Supplementary figure S1.** Flow cytometry analysis of mitochondrial activity. Different dot-plots were used to identify single sperm, focused sperm and different sperm populations (upper panels). Lower panels show images of apoptotic spermatozoa with active mitochondria (YOPRO+/MT+) apoptotic spermatozoa with inactive mitochondria (YOPRO+/MT-) and viable spermatozoa with active mitochondria (YOPRO-/MT+).
